# Supplementary material
Source: PubMed Central journal article supplement (PMC2701478)

Figure S1

Legend: Based on distance criterion, it is not possible to unambiguously determine the orientation of the Gln97 side chain. Possible hydrogen bonds between the thymine base and the side chain are shown as green and red dashed lines. The colors correspond to the two alternative orientations of the side chain. Either orientation is plausible, albeit with different H-bond donor-acceptor pairs.

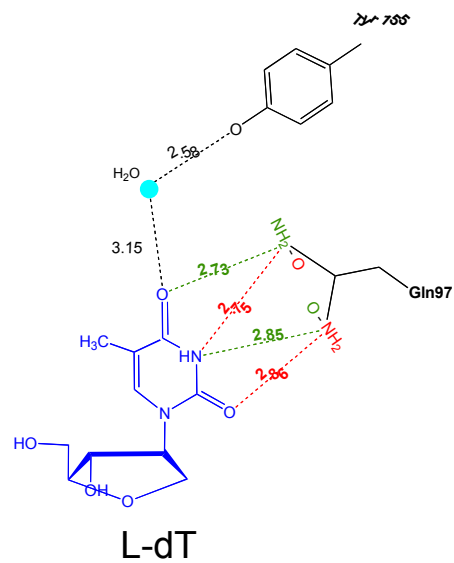

Supplement: NIHMS91523-supplement-1_si_001.pdf [file NIHMS91523-supplement-1_si_001.pdf]
